# Supplementary material for: Identification of Functional Genetic Variations Underlying Flooding Tolerance in Brazilian Soybean Genotypes
Source: MDPI journal article supplement (doi:10.3390/ijms231810611), 2022-09-13
Supplement: s1 [file s1]

Supplementary Table S6: Associative analysis of SNPs markers for phenotyping (visual score) of Brazilian soybean genotypes under flooding conditions, in experiment 3.

| Experiment 3     |                  |                             |                |                             |                |                             |                |                            |                |
|------------------|------------------|-----------------------------|----------------|-----------------------------|----------------|-----------------------------|----------------|----------------------------|----------------|
| Molecular Marker | N <sup>(1)</sup> | 1 <sup>st</sup> Phenotyping |                | 2 <sup>nd</sup> Phenotyping |                | 3 <sup>rd</sup> Phenotyping |                | 4 <sup>a</sup> Phenotyping |                |
|                  |                  | M <sup>(2)</sup>            | <i>p-value</i> | M <sup>(3)</sup>            | <i>p-value</i> | M <sup>(4)</sup>            | <i>p-value</i> | M <sup>(5)</sup>           | <i>p-value</i> |
| GSM0599          |                  |                             |                |                             |                |                             |                |                            |                |
| CC               | 24               | 6.09                        | 0.07           | 5.84                        | 0.03           | 5.95                        | 0.2            | 5.77                       | 0.21           |
| GG               | 2                | 5.5                         |                | 5.06                        |                | 5.56                        |                | 5.32                       |                |
| GSM0600          |                  |                             |                |                             |                |                             |                |                            |                |
| AA               | 25               | 6.04                        | nd             | 6                           | nd             | 5.9                         | nd             | 5.7                        | nd             |
| CC               | 1                | 6.38                        |                | 6.5                         |                | 6.5                         |                | 6.63                       |                |
| GSM0601          |                  |                             |                |                             |                |                             |                |                            |                |
| TT               | 20               | 6.09                        | 0.13           | 5.8                         | 0.12           | 5.59                        | 0.31           | 5.72                       | 0.39           |
| AA               | 4                | 5.75                        |                | 5.44                        |                | 5.75                        |                | 5.84                       |                |
| GSM0602          |                  |                             |                |                             |                |                             |                |                            |                |
| TT               | 14               | 6.13                        | 0.21           | 5.8                         | 0.48           | 5.93                        | 0.46           | 5.66                       | 0.27           |
| AA               | 10               | 5.94                        |                | 5.79                        |                | 5.96                        |                | 5.86                       |                |
| GSM0603          |                  |                             |                |                             |                |                             |                |                            |                |
| TT               | 13               | 5.96                        | 0.11           | 5.69                        | 0.18           | 5.82                        | 0.18           | 5.6                        | 0.15           |
| GG               | 10               | 6.25                        |                | 5.91                        |                | 6.05                        |                | 5.95                       |                |
| GSM0604          |                  |                             |                |                             |                |                             |                |                            |                |
| TT               | 18               | 6.02                        | 0.47           | 5.73                        | 0.43           | 5.85                        | 0.43           | 5.7                        | 0.45           |
| AA               | 5                | 6                           |                | 5.78                        |                | 5.9                         |                | 5.65                       |                |
| GSM0605          |                  |                             |                |                             |                |                             |                |                            |                |
| TT               | 10               | 6.25                        | 0.11           | 5.89                        | 0.23           | 6.09                        | 0.12           | 5.85                       | 0.30           |
| GG               | 13               | 5.96                        |                | 5.71                        |                | 5.79                        |                | 5.67                       |                |
| GSM0611          |                  |                             |                |                             |                |                             |                |                            |                |
| TT               | 18               | 6.03                        | 0.49           | 5.71                        | 0.32           | 5.81                        | 0.12           | 5.56                       | 0.02           |
| CC               | 6                | 6.04                        |                | 5.83                        |                | 6.15                        |                | 6.29                       |                |

| GSM0612 |    |      |      |      |      |      |      |      |      |
|---------|----|------|------|------|------|------|------|------|------|
| TT      | 9  | 5.93 | 0.16 | 5.54 | 0.03 | 5.63 | 0.02 | 5.4  | 0.04 |
| CC      | 15 | 6.17 |      | 5.98 |      | 6.16 |      | 5.99 |      |
| GSM0613 |    |      |      |      |      |      |      |      |      |
| GG      | 9  | 5.93 | 0.22 | 5.54 | 0.04 | 5.38 | 0    | 5.4  | 0.05 |
| AA      | 15 | 6.12 |      | 5.95 |      | 6.13 |      | 5.95 |      |
| GSM0614 |    |      |      |      |      |      |      |      |      |
| CC      | 9  | 5.88 | 0.14 | 5.88 | 0.32 | 5.89 | 0.47 | 5.53 | 0.20 |
| AA      | 16 | 6.13 |      | 5.79 |      | 5.91 |      | 5.8  |      |
| GSM0615 |    |      |      |      |      |      |      |      |      |
| GG      | 14 | 6.13 | 0.32 | 5.84 | 0.41 | 5.96 | 0.48 | 5.78 | 0.47 |
| AA      | 10 | 6.01 |      | 5.79 |      | 5.95 |      | 5.75 |      |
| GSM0616 |    |      |      |      |      |      |      |      |      |
| TT      | 19 | 6.05 | 0.45 | 5.69 | 0.17 | 5.8  | 0.09 | 5.56 | 0.03 |
| CC      | 6  | 6.08 |      | 5.94 |      | 6.17 |      | 6.23 |      |
| GSM0617 |    |      |      |      |      |      |      |      |      |
| TT      | 9  | 5.97 | 0.29 | 5.68 | 0.28 | 5.86 | 0.39 | 5.61 | 0.30 |
| AA      | 15 | 6.11 |      | 5.82 |      | 5.93 |      | 5.79 |      |
| GSM0618 |    |      |      |      |      |      |      |      |      |
| TT      | 9  | 5.97 | 0.44 | 5.68 | 0.43 | 5.86 | 0.47 | 5.61 | 0.33 |
| CC      | 14 | 5.94 |      | 5.72 |      | 5.88 |      | 5.76 |      |
| GSM0619 |    |      |      |      |      |      |      |      |      |
| TT      | 24 | 6.07 | 0.22 | 5.81 | 0.14 | 5.93 | 0.45 | 5.73 | 0.40 |
| GG      | 2  | 5.75 |      | 5.38 |      | 5.88 |      | 5.88 |      |
| GSM0620 |    |      |      |      |      |      |      |      |      |
| GG      | 25 | 6.06 | nd   | 5.83 | nd   | 5.99 | nd   | 5.83 | nd   |
| AA      | 1  | 5.63 |      | 4.88 |      | 5.5  |      | 5.5  |      |
| GSM0621 |    |      |      |      |      |      |      |      |      |
| AA      | 24 | 6.05 | nd   | 5.81 | nd   | 5.95 | nd   | 5.77 | nd   |
| TT      | 1  | 5.63 |      | 4.88 |      | 5.5  |      | 5.5  |      |
| GSM0622 |    |      |      |      |      |      |      |      |      |

|         |    |      |      |      |      |      |      |      |      |
|---------|----|------|------|------|------|------|------|------|------|
| GG      | 12 | 5.82 | 0.02 | 5.7  | 0.25 | 5.93 | 0.49 | 5.82 | 0.32 |
| AA      | 14 | 6.24 |      | 5.85 |      | 5.92 |      | 5.69 |      |
| GSM0623 |    |      |      |      |      |      |      |      |      |
| TT      | 11 | 6.15 | 0.24 | 5.77 | 0.48 | 5.88 | 0.41 | 5.79 | 0.37 |
| AA      | 13 | 5.98 |      | 5.76 |      | 5.93 |      | 5.68 |      |
| GSM0625 |    |      |      |      |      |      |      |      |      |
| GG      | 11 | 6.15 | 0.22 | 5.72 | 0.26 | 5.78 | 0.09 | 6.07 | 0.03 |
| AA      | 15 | 5.98 |      | 5.86 |      | 6.11 |      | 5.49 |      |
| GSM0626 |    |      |      |      |      |      |      |      |      |
| GG      | 10 | 5.99 | 0.46 | 5.75 | 0.36 | 5.84 | 0.43 | 5.73 | 0.42 |
| AA      | 13 | 6.01 |      | 5.68 |      | 5.88 |      | 5.66 |      |

<sup>(1)</sup> Number of genotypes classified in each group and (2) (3) (4) (5) Average of visual damage scales performed 3, 15, 29, 43 and 60 days after drainage, respectively from experiment 3 in the 2018 season /19; nd: data not available. Values in bold differ by the 5% t-test for phenotyping after flooding.
