# Supplementary material for: Identification of Functional Genetic Variations Underlying Flooding Tolerance in Brazilian Soybean Genotypes
Source: MDPI journal article supplement (doi:10.3390/ijms231810611), 2022-09-13
Supplement: s1 [file s1]

Supplementary Table S1: List of primer sequence and related information for each gene.

| Name   | Locus ID          | Annotation                                               | Sequence 5'-3'                                         | Amplicon size (bp) | Reference                  |
|--------|-------------------|----------------------------------------------------------|--------------------------------------------------------|--------------------|----------------------------|
| LCT 06 | Glyma.05G063600   | Ethylene-responsive transcription factor 15-related      | F: GGCGAGTCCGAATCCATATT<br>R: CCCAATTGTCGCTCAAACAC     | 94                 | This study                 |
| LCT 07 | Glyma.08G189600.1 | Linoleate 9S-lipoxygenase / Linoleate 9-lipoxygenase     | F: ATATCCTTAACCGGCCAACTC<br>R: GGCATCACTCTTCCCTGTAAT   | 125                | This study                 |
| LCT 09 | Glyma.09G041500.1 | AP2 domain (AP2)                                         | F: GACGAACTCGACCTGAAACA<br>R: CATCCATGTTGTCCCACTCA     | 97                 | This study                 |
| LCT 10 | Glyma.02G257700.1 | Leucocyanidin oxygenase / Leucoanthocyanidin dioxygenase | F: ATACCCATAGAGCCAGCAAAG<br>R: CGCATGGTCCTCTCAATCTAAT  | 109                | This study                 |
| LCT 11 | Glyma.14G042200.1 | Alcohol dehydrogenase related                            | F: GCCAGGTTCTCCATTGAGTATT<br>R: TCGCTGTGACAAAGAGAAGTG  | 99                 | This study                 |
| LCT 12 | Glyma.14G121200.1 | Alcohol dehydrogenase related                            | F: GGTGATTGAAGAAGTGGAGGT<br>R: GTGGCAAAGAGAGGTGTAGAG   | 79                 | This study                 |
| ETR    | Glyma.19G213300   | Two-component sensor histidine kinase                    | F: ATGGATGCCTTCAAGAAGTGG<br>R: GCACATATCTTCCCACAAGAGG  | 188                | Arraes <i>et al.</i> 2015  |
| ACO    | Glyma.14G048900   | 1-aminocyclopropane-1-carboxylate oxidase 3-related      | F: CCAATGCGCCATTCCATTGTTG<br>R: TGAGGCTACGGACATTCTGGTC | 126                | Arraes <i>et al.</i> 2015  |
| Fbox   | Glyma.12G051100   | F-Box only protein 3                                     | F: GATAGGGAAATGTTGCAGGT<br>R: CTAATGGCAATTGCAGCTCTC    | 93                 | Le <i>et al.</i> 2012      |
| CYP2A  | Glyma.12G024700   | Peptidyl-prolyl cis-trans isomerase CYP18-3-related      | F: CGGGACCAGTGTGCTTCTTCA<br>R: CCCCTCCACTACAAAGGCTCG   | 154                | Miranda <i>et al.</i> 2013 |

|            |                 |                                    |                                                        |     |                            |
|------------|-----------------|------------------------------------|--------------------------------------------------------|-----|----------------------------|
| ELF 1A     | Glyma.05G114900 | Elongation factor 1-alpha          | F: GACCTTCTTCGTTTCTCGCA<br>R: CGAACCTCTCAATCACACGC     | 195 | Miranda <i>et al.</i> 2013 |
| ELF 1B     | Glyma.02G276600 | Elongation factor 1-beta 1-related | F: GTTGAAAAGCCAGGGGACA<br>R: TCTTACCCCTTGAGCGTGG       | 118 | Miranda <i>et al.</i> 2013 |
| TUA5       | *               | Tubulin                            | F: AGGTCGGAAACTCCTGCTGG<br>R: AAGGTGTTGAAGGCGTCGTG     | 159 | Miranda <i>et al.</i> 2013 |
| UBC4       | *               | Ubiquitin conjugating enzyme       | F: GAGCGAGCAGTTTCAGAC<br>R: CATAGGAGGGACGATACG         | 168 | Miranda <i>et al.</i> 2013 |
| UBC2       | Glyma.18G124600 | Ubiquitin conjugating enzyme       | F: TCCCCTCACACCCTTCCTC<br>R: CCATCCCAAGGGGTGTCAT       | 155 | Miranda <i>et al.</i> 2013 |
| ACT11      | Glyma.18G290800 | Actin                              | F: CGGTGGTTCTATCTTGGCATC<br>R: GTCTTTCGCTTCAATAACCCTA  | 142 | Miranda <i>et al.</i> 2013 |
| G6PD       | *               | Glucose-6-phosphate dehydrogenase  | F: ACTCCTTGATACCGTTGTCCAT<br>R: GTTTGTTATCCGCCTACAGCCT | 126 | Miranda <i>et al.</i> 2013 |
| Isoflavone | Glyma.06G030900 | Isoflavone                         | F: CGAGTTTCTGCCTCTGCTTT<br>R: CCCATTGAAGTTTCTGTACTGC   | 91  | Khatoon <i>et al.</i> 2012 |

---
