# Supplementary material for: Identification of Functional Genetic Variations Underlying Flooding Tolerance in Brazilian Soybean Genotypes
Source: MDPI journal article supplement (doi:10.3390/ijms231810611), 2022-09-13
Supplement: s1 [file s1]

Supplementary Table S7: Associative analysis of SNPs markers for phenotyping (visual score) of Brazilian soybean genotypes under flooding conditions, in experiment 4.

| Experiment 4     |                  |                             |                |                             |                |                             |                |
|------------------|------------------|-----------------------------|----------------|-----------------------------|----------------|-----------------------------|----------------|
| Molecular Marker | N <sup>(1)</sup> | 1 <sup>st</sup> Phenotyping |                | 2 <sup>nd</sup> Phenotyping |                | 3 <sup>rd</sup> Phenotyping |                |
|                  |                  | M <sup>(2)</sup>            | <i>p-value</i> | M <sup>(3)</sup>            | <i>p-value</i> | M <sup>(4)</sup>            | <i>p-value</i> |
| GSM0599          |                  |                             |                |                             |                |                             |                |
| CC               | 74               | 6.93                        | 0.33           | 6.96                        | 0.21           | 7.01                        | 0.49           |
| GG               | 2                | 6.63                        |                | 6.5                         |                | 7                           |                |
| GSM0600          |                  |                             |                |                             |                |                             |                |
| AA               | 65               | 6.96                        | 0.19           | 6.95                        | 0.4            | 7.02                        | 0.44           |
| CC               | 11               | 6.68                        |                | 6.89                        |                | 6.98                        |                |
| GSM0601          |                  |                             |                |                             |                |                             |                |
| TT               | 53               | 6.88                        | 0.28           | 6.95                        | 0.31           | 6.95                        | 0.14           |
| AA               | 22               | 7.02                        |                | 7.02                        |                | 7.17                        |                |
| GSM0602          |                  |                             |                |                             |                |                             |                |
| TT               | 52               | 6.91                        | 0.39           | 6.96                        | 0.32           | 7.01                        | 0.46           |
| AA               | 17               | 6.84                        |                | 6.85                        |                | 6.99                        |                |
| GSM0603          |                  |                             |                |                             |                |                             |                |
| TT               | 37               | 6.74                        | 0.09           | 6.83                        | 0.15           | 6.87                        | 0.09           |
| GG               | 36               | 7.05                        |                | 7.03                        |                | 7.13                        |                |
| GSM0604          |                  |                             |                |                             |                |                             |                |
| TT               | 51               | 6.82                        | 0.15           | 6.86                        | 0.12           | 6.88                        | 0.03           |
| AA               | 22               | 7.08                        |                | 7.1                         |                | 7.27                        |                |
| GSM0605          |                  |                             |                |                             |                |                             |                |
| TT               | 23               | 6.41                        | 0              | 6.53                        | 0              | 6.59                        | 0              |
| GG               | 50               | 7.09                        |                | 7.08                        |                | 7.14                        |                |
| GSM0611          |                  |                             |                |                             |                |                             |                |
| TT               | 45               | 6.86                        | 0.27           | 6.91                        | 0.39           | 6.91                        | 0.08           |
| CC               | 28               | 7                           |                | 6.96                        |                | 7.18                        |                |

|                |    |      |      |      |      |      |      |
|----------------|----|------|------|------|------|------|------|
| <b>GSM0612</b> |    |      |      |      |      |      |      |
| TT             | 32 | 6.73 | 0.06 | 6.94 | 0.06 | 6.94 | 0.22 |
| CC             | 41 | 7.09 |      | 7.09 |      | 7.09 |      |
| <b>GSM0613</b> |    |      |      |      |      |      |      |
| GG             | 32 | 6.73 | 0.08 | 6.8  | 0.08 | 6.94 | 0.25 |
| AA             | 39 | 7.06 |      | 7.06 |      | 7.07 |      |
| <b>GSM0614</b> |    |      |      |      |      |      |      |
| CC             | 26 | 6.71 | 0.1  | 6.68 | 0.11 | 6.85 | 0.12 |
| AA             | 49 | 7.01 |      | 7.02 |      | 7.08 |      |
| <b>GSM0615</b> |    |      |      |      |      |      |      |
| GG             | 42 | 6.86 | 0.36 | 6.86 | 0.15 | 6.9  | 0.12 |
| AA             | 29 | 6.94 |      | 7.03 |      | 7.13 |      |
| <b>GSM0616</b> |    |      |      |      |      |      |      |
| TT             | 42 | 6.92 | 0.38 | 6.92 | 0.46 | 6.99 | 0.49 |
| CC             | 31 | 6.85 |      | 6.94 |      | 6.99 |      |
| <b>GSM0617</b> |    |      |      |      |      |      |      |
| TT             | 23 | 6.9  | 0.48 | 6.9  | 0.33 | 6.9  | 0.25 |
| AA             | 50 | 6.89 |      | 6.86 |      | 7.04 |      |
| <b>GSM0618</b> |    |      |      |      |      |      |      |
| TT             | 21 | 6.88 | 0.37 | 6.86 | 0.21 | 6.88 | 0.17 |
| CC             | 52 | 6.96 |      | 7    |      | 7.09 |      |
| <b>GSM0619</b> |    |      |      |      |      |      |      |
| TT             | 73 | 6.91 | 0.44 | 7    | 0.25 | 7    | 0.37 |
| GG             | 3  | 7    |      | 7.25 |      | 7.17 |      |
| <b>GSM0620</b> |    |      |      |      |      |      |      |
| GG             | 74 | 6.93 | nd   | 6.96 | nd   | 7.3  | nd   |
| AA             | 1  | 5.75 |      | 6    |      | 6.25 |      |
| <b>GSM0621</b> |    |      |      |      |      |      |      |
| AA             | 75 | 6.93 | nd   | 6.96 | nd   | 7.28 | nd   |
| TT             | 1  | 5.75 |      | 6    |      | 6.25 |      |
| <b>GSM0622</b> |    |      |      |      |      |      |      |

|         |    |      |      |      |      |      |      |
|---------|----|------|------|------|------|------|------|
| GG      | 43 | 6.93 | 0.5  | 6.9  | 0.25 | 7.03 | 0.48 |
| AA      | 29 | 6.93 |      | 7.03 |      | 7.02 |      |
| GSM0623 |    |      |      |      |      |      |      |
| TT      | 22 | 7.06 | 0.2  | 7.09 | 0.15 | 7.14 | 0.17 |
| AA      | 50 | 7    |      | 6.88 |      | 6.94 |      |
| GSM0625 |    |      |      |      |      |      |      |
| GG      | 46 | 6.84 | 0.21 | 6.88 | 0.22 | 6.92 | 0.14 |
| AA      | 28 | 7.03 |      | 7.03 |      | 7.13 |      |
| GSM0626 |    |      |      |      |      |      |      |
| GG      | 47 | 6.95 | 0.34 | 6.97 | 0.37 | 7.04 | 0.33 |
| AA      | 29 | 6.86 |      | 6.91 |      | 6.96 |      |

(1) Number of genotypes classified in each group and (2) (3) (4) Average of visual damage scales performed 5, 10, 23 and 38 days after drainage, respectively from experiment 4 in the 2018/19 season; nd: data not available. The values in bold differ by the t test at 5% regarding phenotyping after flooding
