# Supplementary material for: Identification of Functional Genetic Variations Underlying Flooding Tolerance in Brazilian Soybean Genotypes
Source: MDPI journal article supplement (doi:10.3390/ijms231810611), 2022-09-13
Supplement: s1 [file s1]

Supplementary Table S5: Associative analysis of SNPs markers and phenotyping (visual score and productivity) of soybean Brazilian genotypes submitted to flooding (Experiment 2).

| Experiment 2     |                  |                             |                |                             |                |                             |                |                                         |                |
|------------------|------------------|-----------------------------|----------------|-----------------------------|----------------|-----------------------------|----------------|-----------------------------------------|----------------|
| Molecular Marker | N <sup>(1)</sup> | 1 <sup>st</sup> Phenotyping |                | 2 <sup>nd</sup> Phenotyping |                | 3 <sup>rd</sup> Phenotyping |                | Productivity                            |                |
|                  |                  | M <sup>(2)</sup>            | <i>p-value</i> | M <sup>(3)</sup>            | <i>p-value</i> | M <sup>(4)</sup>            | <i>p-value</i> | M <sup>(5)</sup> (kg ha <sup>-1</sup> ) | <i>p-value</i> |
| GSM0599          |                  |                             |                |                             |                |                             |                |                                         |                |
| CC               | 30               | 6.4                         |                | 6.08                        |                | 6.24                        |                | 1509.79                                 |                |
| GG               | 1                | 6                           | nd             | 5                           | nd             | 5.75                        | nd             | 1479.2                                  | nd             |
| GSM0600          |                  |                             |                |                             |                |                             |                |                                         |                |
| AA               | 29               | 6.39                        |                | 6.04                        |                | 6.23                        |                | 1504.48                                 |                |
| CC               | 3                | 6.79                        | 0.22           | 6.5                         | 0.23           | 6.54                        | 0.27           | 1285.39                                 | 0.22           |
| GSM0601          |                  |                             |                |                             |                |                             |                |                                         |                |
| TT               | 23               | 6.03                        |                | 6.53                        |                | 6.53                        |                | 1357.26                                 |                |
| AA               | 9                | 5.9                         | 0.01           | 5.39                        | 0.01           | 5.57                        | 0              | 1807.69                                 | 0.01           |
| GSM0602          |                  |                             |                |                             |                |                             |                |                                         |                |
| TT               | 22               | 6.34                        |                | 5.99                        |                | 6.12                        |                | 1591.09                                 |                |
| AA               | 9                | 6.69                        | 0.15           | 6.44                        | 0.13           | 6.64                        | 0.06           | 1222.54                                 | 0.02           |
| GSM0603          |                  |                             |                |                             |                |                             |                |                                         |                |
| TT               | 19               | 6.46                        |                | 6.14                        |                | 6.28                        |                | 1477.47                                 |                |
| GG               | 13               | 6.38                        | 0.4            | 6.22                        | 0.37           | 6.22                        | 0.42           | 1493.41                                 | 0.46           |
| GSM0604          |                  |                             |                |                             |                |                             |                |                                         |                |
| TT               | 23               | 6.7                         |                | 5.43                        |                | 6.52                        |                | 1385.58                                 |                |
| AA               | 8                | 5.64                        | 0              | 5.2                         | 0              | 5.41                        | 0              | 1777.87                                 | 0.02           |
| GSM0605          |                  |                             |                |                             |                |                             |                |                                         |                |
| TT               | 14               | 6.67                        |                | 6.26                        |                | 6.29                        |                | 1445.02                                 |                |
| GG               | 15               | 6.25                        | 0.09           | 5.91                        | 0.17           | 6.26                        | 0.45           | 1542.09                                 | 0.28           |
| GSM0611          |                  |                             |                |                             |                |                             |                |                                         |                |
| TT               | 20               | 6.4                         |                | 6.4                         |                | 6.1                         |                | 1566.45                                 |                |
| CC               | 12               | 6.47                        | 0.41           | 6.47                        | 0.38           | 6.52                        | 0.08           | 1346.43                                 | 0.1            |

| GSM0612 |    |      |      |      |      |      |      |         |      |
|---------|----|------|------|------|------|------|------|---------|------|
| TT      | 12 | 6.06 | 0.03 | 5.53 | 0.01 | 5.72 | 0    | 1770.12 | 0    |
| CC      | 20 | 6.65 |      | 6.42 |      | 6.58 |      | 1312.23 |      |
| GSM0613 |    |      |      |      |      |      |      |         |      |
| GG      | 12 | 6.06 | 0.04 | 5.53 | 0.01 | 5.72 | 0    | 1770.12 | 0    |
| AA      | 19 | 6.57 |      | 6.37 |      | 6.54 |      | 1347.16 |      |
| GSM0614 |    |      |      |      |      |      |      |         |      |
| CC      | 12 | 6.4  | 0.44 | 6.01 | 0.37 | 6.29 | 0.43 | 1526.35 | 0.35 |
| AA      | 20 | 6.44 |      | 6.13 |      | 6.24 |      | 1458.5  |      |
| GSM0615 |    |      |      |      |      |      |      |         |      |
| GG      | 19 | 6.59 | 0.12 | 6.31 | 0.07 | 6.37 | 0.21 | 1415.02 | 0.15 |
| AA      | 12 | 6.21 |      | 5.75 |      | 6.11 |      | 1596.94 |      |
| GSM0616 |    |      |      |      |      |      |      |         |      |
| TT      | 23 | 6.59 | 0.04 | 6.25 | 0.07 | 6.27 | 0.44 | 1433.02 | 0.17 |
| CC      | 9  | 6    |      | 5.66 |      | 6.22 |      | 1614.09 |      |
| GSM0617 |    |      |      |      |      |      |      |         |      |
| TT      | 7  | 6.25 | 0.28 | 5.8  | 0.2  | 5.98 | 0.17 | 1576.17 | 0.27 |
| AA      | 24 | 6.48 |      | 6.18 |      | 6.33 |      | 1448.16 |      |
| GSM0618 |    |      |      |      |      |      |      |         |      |
| TT      | 7  | 6.25 | 0.27 | 5.8  | 0.18 | 5.98 | 0.2  | 1576.17 | 0.27 |
| CC      | 22 | 6.5  |      | 6.23 |      | 6.3  |      | 1445.55 |      |
| GSM0619 |    |      |      |      |      |      |      |         |      |
| TT      | 30 | 6.48 | 0.09 | 6.18 | 0.02 | 6.3  | 0.13 | 1469.78 | 0.26 |
| GG      | 2  | 5.63 |      | 4.63 |      | 5.62 |      | 1696.34 |      |
| GSM0620 |    |      |      |      |      |      |      |         |      |
| GG      | 30 | 6.47 | 0.15 | 6.15 | 0.07 | 6.31 | 0.09 | 1472.51 | 0.3  |
| AA      | 2  | 5.81 |      | 5.06 |      | 5.5  |      | 1655.39 |      |
| GSM0621 |    |      |      |      |      |      |      |         |      |
| AA      | 30 | 6.47 | 0.15 | 6.15 | 0.07 | 6.31 | 0.09 | 1472.51 | 0.3  |

|                |    |      |      |      |      |      |      |         |             |
|----------------|----|------|------|------|------|------|------|---------|-------------|
| TT             | 2  | 5.81 |      | 5.06 |      | 5.5  |      | 1655.39 |             |
| <b>GSM0622</b> |    |      |      |      |      |      |      |         |             |
| GG             | 18 | 6.28 |      | 5.99 |      | 6.16 |      | 1565.24 |             |
| AA             | 14 | 6.61 | 0.15 | 6.21 | 0.28 | 6.38 | 0.22 | 1379.42 | 0.14        |
| <b>GSM0623</b> |    |      |      |      |      |      |      |         |             |
| TT             | 16 | 6.6  |      | 6.3  |      | 6.48 |      | 1416.24 |             |
| AA             | 16 | 6.26 | 0.13 | 5.87 | 0.12 | 6.04 | 0.06 | 1551.64 | 0.21        |
| <b>GSM0625</b> |    |      |      |      |      |      |      |         |             |
| GG             | 20 | 6.55 |      | 6.24 |      | 6.42 |      | 1378.23 |             |
| AA             | 12 | 6.23 | 0.16 | 5.83 | 0.14 | 5.98 | 0.07 | 1660.12 | <b>0.05</b> |
| <b>GSM0626</b> |    |      |      |      |      |      |      |         |             |
| GG             | 17 | 6.3  |      | 6.01 |      | 6.21 |      | 1524.07 |             |
| AA             | 15 | 6.58 | 0.18 | 6.17 | 0.34 | 6.31 | 0.37 | 1438.47 | 0.31        |

(1) Number of genotypes classified in each allele group; (2), (3) and (4) Mean of visual damage scales performed 8, 23 and 43 days after water drainage, respectively; (5) Average productivity; nd: data not available. Values in bold highlights p-values < 0.05 obtained by t-test.
