# Supplementary material for: Identification of Functional Genetic Variations Underlying Flooding Tolerance in Brazilian Soybean Genotypes
Source: MDPI journal article supplement (doi:10.3390/ijms231810611), 2022-09-13
Supplement: s1 [file s1]

Table S4. Associative analysis of SNPs markers and phenotyping (visual score) of soybean Brazilian genotypes submitted to flooding (Experiment 1).

| Experiment 1        |                  |                  |                |                     |                  |                  |                |
|---------------------|------------------|------------------|----------------|---------------------|------------------|------------------|----------------|
| Molecular<br>Marker | Phenotyping      |                  |                | Molecular<br>Marker | Phenotyping      |                  |                |
|                     | N <sup>(1)</sup> | M <sup>(2)</sup> | <i>p-value</i> |                     | N <sup>(1)</sup> | M <sup>(2)</sup> | <i>p-value</i> |
| GSM0599             |                  |                  |                | GSM0615             |                  |                  |                |
| CC                  | 92               | 7.97             | 0.46           | GG                  | 54               | 7.94             | 0.32           |
| GG                  | 3                | 7.93             |                | AA                  | 41               | 7.99             |                |
| GSM0600             |                  |                  |                | GSM0616             |                  |                  |                |
| AA                  | 62               | 7.86             | 0.01           | TT                  | 62               | 8.08             | 0.00           |
| CC                  | 33               | 8.15             |                | CC                  | 32               | 7.76             |                |
| GSM0601             |                  |                  |                | GSM0617             |                  |                  |                |
| TT                  | 79               | 7.9              | 0.01           | TT                  | 30               | 8.08             | 0.09           |
| AA                  | 17               | 8.24             |                | AA                  | 63               | 7.91             |                |
| GSM0602             |                  |                  |                | GSM0618             |                  |                  |                |
| TT                  | 60               | 8.03             | 0.05           | TT                  | 27               | 8.04             | 0.15           |
| AA                  | 36               | 7.84             |                | CC                  | 66               | 7.91             |                |
| GSM0603             |                  |                  |                | GSM0619             |                  |                  |                |
| TT                  | 38               | 8.04             | 0.17           | TT                  | 89               | 7.97             | 0.22           |
| GG                  | 57               | 7.92             |                | GG                  | 4                | 7.74             |                |
| GSM0604             |                  |                  |                | GSM0620             |                  |                  |                |
| TT                  | 68               | 7.97             | 0.46           | GG                  | 81               | 7.97             | 0.05           |
| AA                  | 26               | 7.96             |                | AA                  | 2                | 7.31             |                |
| GSM0605             |                  |                  |                | GSM0621             |                  |                  |                |
| TT                  | 24               | 7.66             | 0.00           | AA                  | 94               | 7.97             | 0.05           |
| GG                  | 70               | 8.06             |                | TT                  | 2                | 7.31             |                |
| GSM0611             |                  |                  |                | GSM0622             |                  |                  |                |
| TT                  | 26               | 7.83             | 0.07           | GG                  | 52               | 7.94             | 0.36           |
| CC                  | 67               | 8.03             |                | AA                  | 44               | 7.98             |                |

|                |    |      |      |                |    |      |             |
|----------------|----|------|------|----------------|----|------|-------------|
| <b>GSM0612</b> |    |      |      | <b>GSM0623</b> |    |      |             |
| TT             | 37 | 8.06 | 0.10 | TT             | 24 | 8.14 | <b>0.04</b> |
| CC             | 55 | 7.91 |      | AA             | 72 | 7.9  |             |
| <b>GSM0613</b> |    |      |      | <b>GSM0625</b> |    |      |             |
| GG             | 39 | 8.05 | 0.13 | GG             | 74 | 8.07 | <b>0.00</b> |
| AA             | 53 | 7.92 |      | AA             | 22 | 7.58 |             |
| <b>GSM0614</b> |    |      |      | <b>GSM0626</b> |    |      |             |
| CC             | 40 | 7.98 | 0.39 | GG             | 78 | 7.97 | 0.43        |
| AA             | 54 | 7.95 |      | AA             | 17 | 7.95 |             |

(1) Number of genotypes classified in each allele group and (2) Average grade of the visual damage scale; nd: data not available. Values in bold highlights p-values < 0.05 obtained by t-test
