# Supplementary material for: Identification of Functional Genetic Variations Underlying Flooding Tolerance in Brazilian Soybean Genotypes
Source: MDPI journal article supplement (doi:10.3390/ijms231810611), 2022-09-13
Supplement: s1 [file s1]

|         |    |        |      |       |      |      |      |      |      |
|---------|----|--------|------|-------|------|------|------|------|------|
| TT      | 9  | 1200.8 | 0.11 | 10.22 | 0.21 | 0.66 | 0.09 | 1.18 | 0.13 |
| CC      | 15 | 1003.4 |      | 12.43 |      | 0.63 |      | 0.83 |      |
| GSM0613 |    |        |      |       |      |      |      |      |      |
| GG      | 9  | 1200.8 | 0.15 | 10.22 | 0.27 | 0.66 | 0.13 | 1.18 | 0.16 |
| AA      | 15 | 1033.4 |      | 11.97 |      | 0.63 |      | 0.85 |      |
| GSM0614 |    |        |      |       |      |      |      |      |      |
| CC      | 9  | 1125.9 | 0.4  | 10.33 | 0.34 | 0.65 | 0.43 | 1    | 0.48 |
| AA      | 16 | 1086.8 |      | 11.41 |      | 0.65 |      | 1.02 |      |
| GSM0615 |    |        |      |       |      |      |      |      |      |
| GG      | 14 | 1091.1 | 0.42 | 12.18 | 0.31 | 0.64 | 0.34 | 0.82 | 0.15 |
| AA      | 10 | 1058.2 |      | 10.8  |      | 0.64 |      | 1.15 |      |
| GSM0616 |    |        |      |       |      |      |      |      |      |
| TT      | 19 | 1151   | 0.11 | 11.05 | 0.36 | 0.65 | 0.13 | 1.04 | 0.49 |
| CC      | 6  | 933.77 |      | 12.17 |      | 0.63 |      | 1.02 |      |
| GSM0617 |    |        |      |       |      |      |      |      |      |
| TT      | 9  | 1122.6 | 0.41 | 10.94 | 0.38 | 0.65 | 0.32 | 0.98 | 0.35 |
| AA      | 15 | 1083.4 |      | 11.83 |      | 0.64 |      | 1.1  |      |
| GSM0618 |    |        |      |       |      |      |      |      |      |
| TT      | 9  | 1122.6 | 0.47 | 10.94 | 0.43 | 0.65 | 0.49 | 0.98 | 0.4  |
| CC      | 14 | 1111   |      | 10.5  |      | 0.65 |      | 0.89 |      |
| GSM0619 |    |        |      |       |      |      |      |      |      |
| TT      | 24 | 1095.3 | 0.39 | 11.42 | 0.32 | 0.65 | 0.44 | 1.02 | 0.25 |
| GG      | 2  | 1019   |      | 9.25  |      | 0.64 |      | 0.63 |      |
| GSM0620 |    |        |      |       |      |      |      |      |      |
| GG      | 25 | 1059.9 | nd   | 19.13 | nd   | 0.64 | nd   | 0.99 | Nd   |
| AA      | 1  | 1045.9 |      | 13.3  |      | 0.65 |      | 0.38 |      |
| GSM0621 |    |        |      |       |      |      |      |      |      |
| AA      | 24 | 1092.4 | nd   | 18.7  | nd   | 0.64 | nd   | 0.96 | Nd   |
| Nd      | 1  | 1045.9 |      |       |      |      |      | 0.38 |      |
| GSM0622 |    |        |      |       |      |      |      |      |      |
| GG      | 12 | 1127.3 | 0.32 | 10.08 | 0.2  | 0.65 | 0.27 | 1.05 | 0.36 |

|                |    |        |             |       |      |      |      |      |      |
|----------------|----|--------|-------------|-------|------|------|------|------|------|
| AA             | 14 | 1057   |             | 12.25 |      | 0.64 |      | 0.94 |      |
| <b>GSM0623</b> |    |        |             |       |      |      |      |      |      |
| TT             | 11 | 1112.7 | 0.43        | 12.05 | 0.36 | 0.64 | 0.49 | 0.98 | 0.33 |
| AA             | 13 | 1085.8 |             | 11.04 |      | 0.64 |      | 1.12 |      |
| <b>GSM0625</b> |    |        |             |       |      |      |      |      |      |
| GG             | 11 | 918.63 | <b>0.02</b> | 12.5  | 0.2  | 0.63 | 0.13 | 0.96 | 0.42 |
| AA             | 15 | 1214.7 |             | 10.33 |      | 0.65 |      | 1.02 |      |
| <b>GSM0626</b> |    |        |             |       |      |      |      |      |      |
| GG             | 10 | 1152.1 | 0.36        | 10.3  | 0.28 | 0.66 | 0.2  | 1.08 | 0.48 |
| AA             | 13 | 1095.1 |             | 11.77 |      | 0.64 |      | 1.06 |      |

(1) Number of genotypes classified in each allele group and (2) (3) (4) (5) Average productivity, mortality, NDVI and leaf retention, respectively, of soybeans in the 2018/19 season, experiment 3. nd: data not available. Values in bold highlights p-values < 0.05 obtained by t-test.
