# Supplementary material for: Identification of Functional Genetic Variations Underlying Flooding Tolerance in Brazilian Soybean Genotypes
Source: MDPI journal article supplement (doi:10.3390/ijms231810611), 2022-09-13
Supplement: s1 [file s1]

Supplementary Table S9. Association of SNPs and mortality and NDVI variables in different Brazilian soybean genotypes under flooding conditions.

| Experiment 4     |                  |                      |                 |                  |                 |
|------------------|------------------|----------------------|-----------------|------------------|-----------------|
| Molecular Marker | N <sup>(1)</sup> | Mortality            |                 | NDVI             |                 |
|                  |                  | M <sup>(2)</sup> (%) | <i>p</i> -value | M <sup>(3)</sup> | <i>p</i> -value |
| <b>GSM0599</b>   |                  |                      |                 |                  |                 |
| CC               | 74               | 54.41                | 0.44            | 0.45             | 0.40            |
| GG               | 2                | 52.5                 |                 | 0.44             |                 |
| <b>GSM0600</b>   |                  |                      |                 |                  |                 |
| AA               | 65               | 54.6                 | 0.4             | 0.45             | 0.35            |
| CC               | 11               | 53.1                 |                 | 0.44             |                 |
| <b>GSM0601</b>   |                  |                      |                 |                  |                 |
| TT               | 53               | 53.3                 | 0.23            | 0.45             | 0.29            |
| AA               | 22               | 57                   |                 | 0.44             |                 |
| <b>GSM0602</b>   |                  |                      |                 |                  |                 |
| TT               | 52               | 53.4                 | 0.45            | 0.45             | 0.18            |
| AA               | 17               | 54.1                 |                 | 0.44             |                 |
| <b>GSM0603</b>   |                  |                      |                 |                  |                 |
| TT               | 37               | 52.8                 | 0.29            | 0.46             | 0.19            |
| GG               | 36               | 55.2                 |                 | 0.44             |                 |
| <b>GSM0604</b>   |                  |                      |                 |                  |                 |
| TT               | 51               | 52.9                 | 0.16            | 0.46             | <b>0.04</b>     |
| AA               | 22               | 57.7                 |                 | 0.43             |                 |
| <b>GSM0605</b>   |                  |                      |                 |                  |                 |
| TT               | 23               | 47.65                | <b>0.03</b>     | 0.47             | <b>0.02</b>     |
| GG               | 50               | 55.94                |                 | 0.44             |                 |
| <b>GSM0611</b>   |                  |                      |                 |                  |                 |
| TT               | 45               | 53.47                | 0.48            | 0.46             | 0.07            |
| CC               | 28               | 53.74                |                 | 0.44             |                 |
| <b>GSM0612</b>   |                  |                      |                 |                  |                 |

|         |    |       |      |      |      |
|---------|----|-------|------|------|------|
| TT      | 32 | 49.38 | 0.02 | 0.45 | 0.3  |
| CC      | 41 | 58.22 |      | 0.44 |      |
| GSM0613 |    |       |      |      |      |
| GG      | 32 | 49.38 | 0.03 | 0.45 | 0.33 |
| AA      | 39 | 58.05 |      | 0.45 |      |
| GSM0614 |    |       |      |      |      |
| CC      | 26 | 48.35 | 0.02 | 0.46 | 0.27 |
| AA      | 49 | 57.12 |      | 0.45 |      |
| GSM0615 |    |       |      |      |      |
| GG      | 42 | 53.07 | 0.38 | 0.46 | 0.18 |
| AA      | 29 | 54.31 |      | 0.44 |      |
| GSM0616 |    |       |      |      |      |
| TT      | 42 | 55.26 | 0.32 | 0.45 | 0.42 |
| CC      | 31 | 53.23 |      | 0.45 |      |
| GSM0617 |    |       |      |      |      |
| TT      | 23 | 53.91 | 0.49 | 0.47 | 0.05 |
| AA      | 50 | 54    |      | 0.44 |      |
| GSM0618 |    |       |      |      |      |
| TT      | 21 | 53.33 | 0.33 | 0.47 | 0.04 |
| CC      | 52 | 55.44 |      | 0.44 |      |
| GSM0619 |    |       |      |      |      |
| TT      | 73 | 54.05 | 0.24 | 0.45 | 0.06 |
| GG      | 3  | 61.67 |      | 0.4  |      |
| GSM0620 |    |       |      |      |      |
| GG      | 74 | 45    | nd   | 0.46 | 0.36 |
| AA      | 1  | 54.74 |      | 0.45 |      |
| GSM0621 |    |       |      |      |      |
| AA      | 75 | 45    | nd   | 0.46 | 0.36 |
| TT      | 1  | 54.48 |      | 0.45 |      |
| GSM0622 |    |       |      |      |      |
| GG      | 43 | 53    | 0.29 | 0.44 | 0.39 |

|                |    |       |      |      |      |
|----------------|----|-------|------|------|------|
| AA             | 29 | 55.45 |      | 0.45 |      |
| <b>GSM0623</b> |    |       |      |      |      |
| TT             | 22 | 53.1  | 0.23 | 0.45 | 0.49 |
| AA             | 50 | 56.59 |      | 0.45 |      |
| <b>GSM0625</b> |    |       |      |      |      |
| GG             | 46 | 52.8  | 0.22 | 0.46 | 0.12 |
| AA             | 28 | 56.29 |      | 0.44 |      |
| <b>GSM0626</b> |    |       |      |      |      |
| GG             | 47 | 53.4  | 0.28 | 0.45 | 0.39 |
| AA             | 29 | 55.9  |      | 0.45 |      |

(1) Number of genotypes classified in each group and (2) (3) Average mortality and NDVI, respectively, of soybean in the 2018/19 season, experiment 4. nd: data not available. Values in bold highlights p-values < 0.05 obtained by t-test.
