# Supplementary figures and images for: Identification of Functional Genetic Variations Underlying Flooding Tolerance in Brazilian Soybean Genotypes
Source: MDPI journal article supplement (doi:10.3390/ijms231810611), 2022-09-13

## TECIRGA control vs. flooding

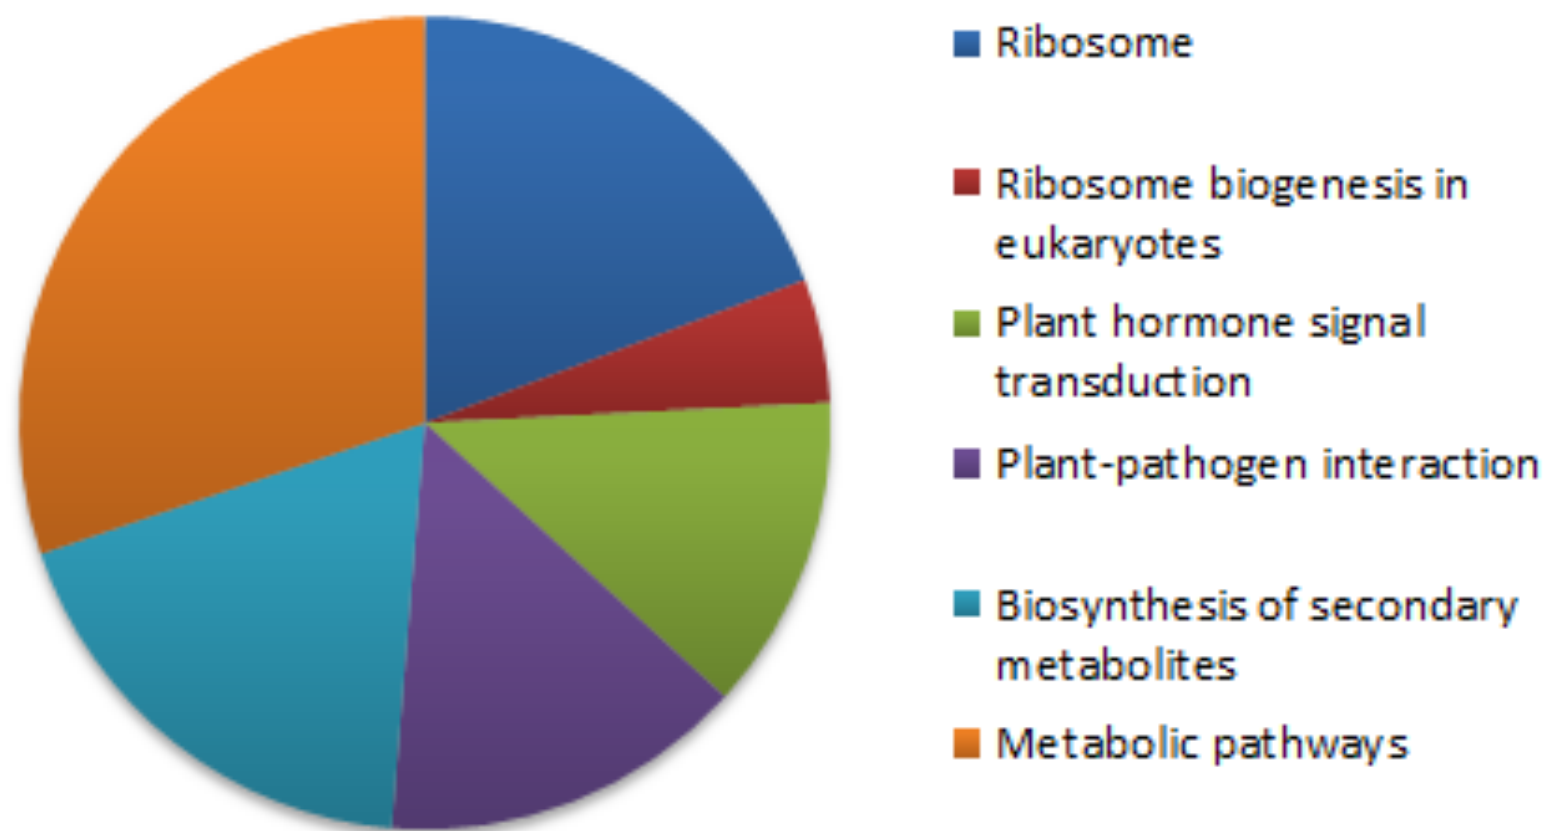

Supplement: s1 [file s1]

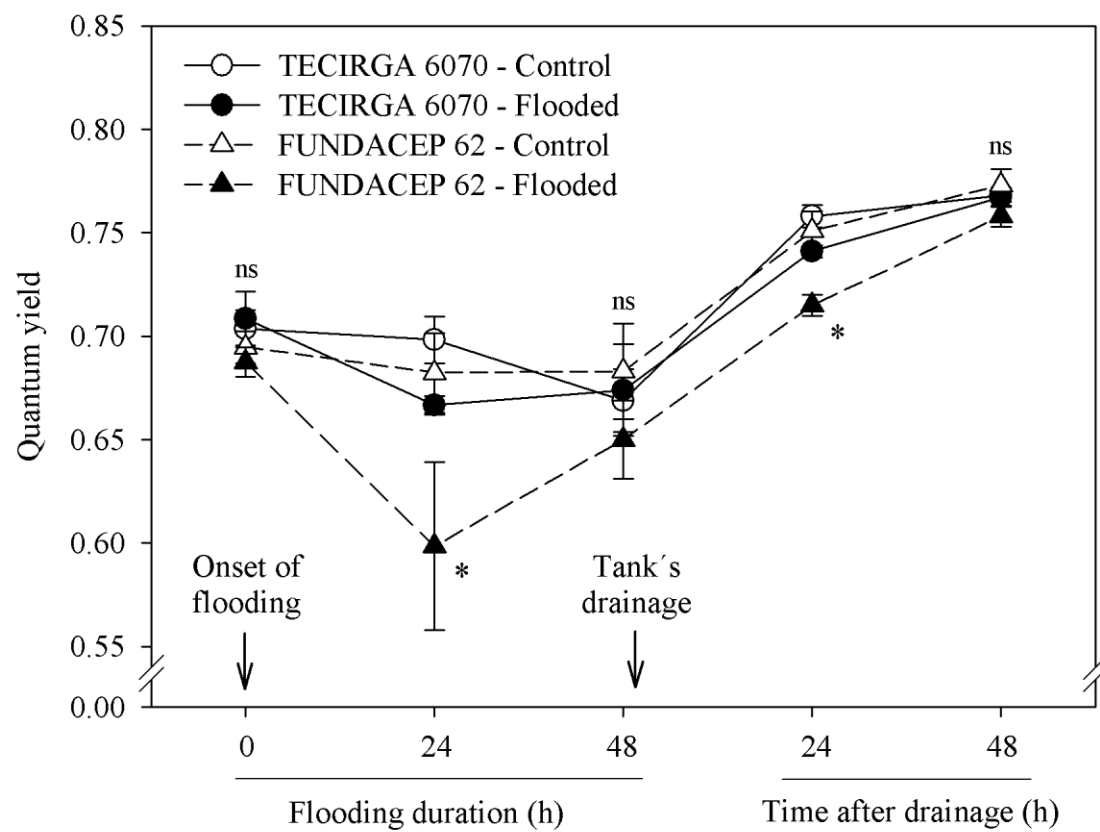

Supplement: s1 [file s1]

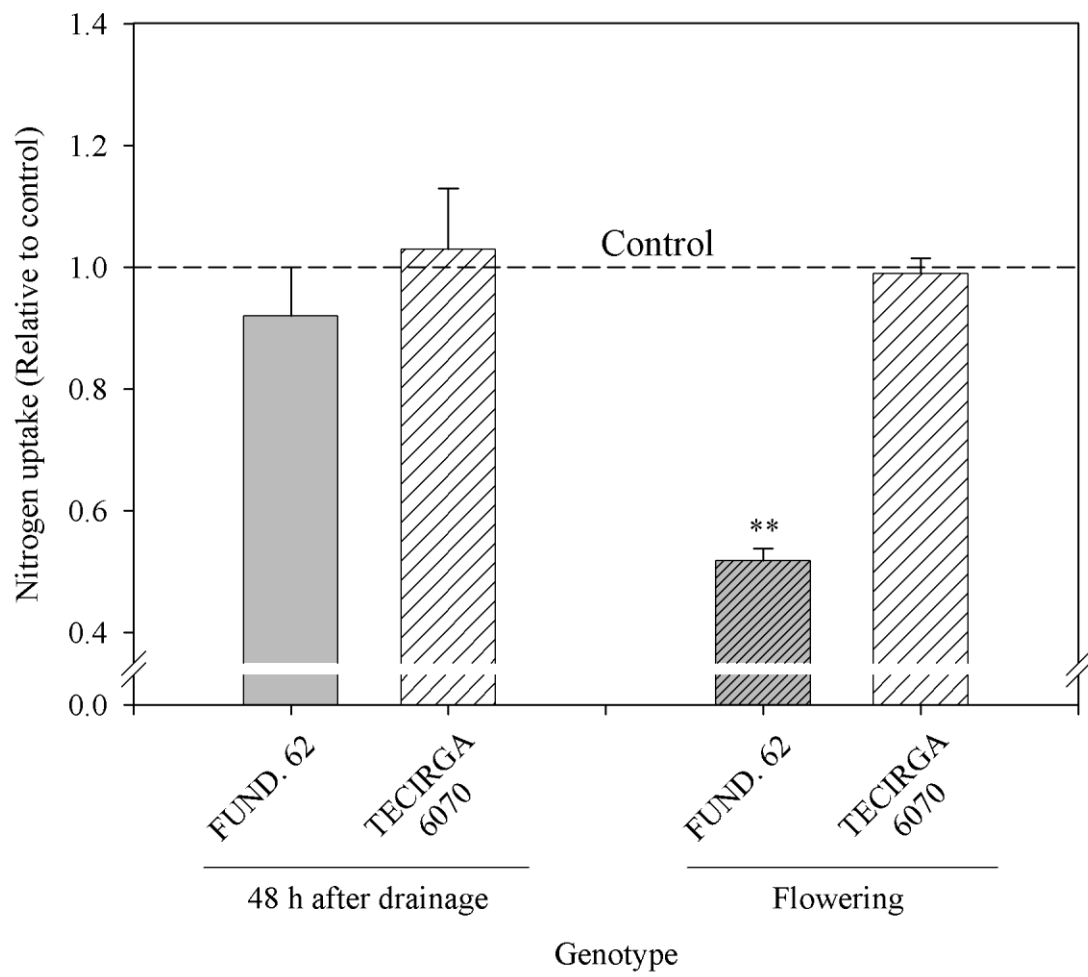

Supplement: s1 [file s1]

## TECIRGA vs 62RR (Flooding)

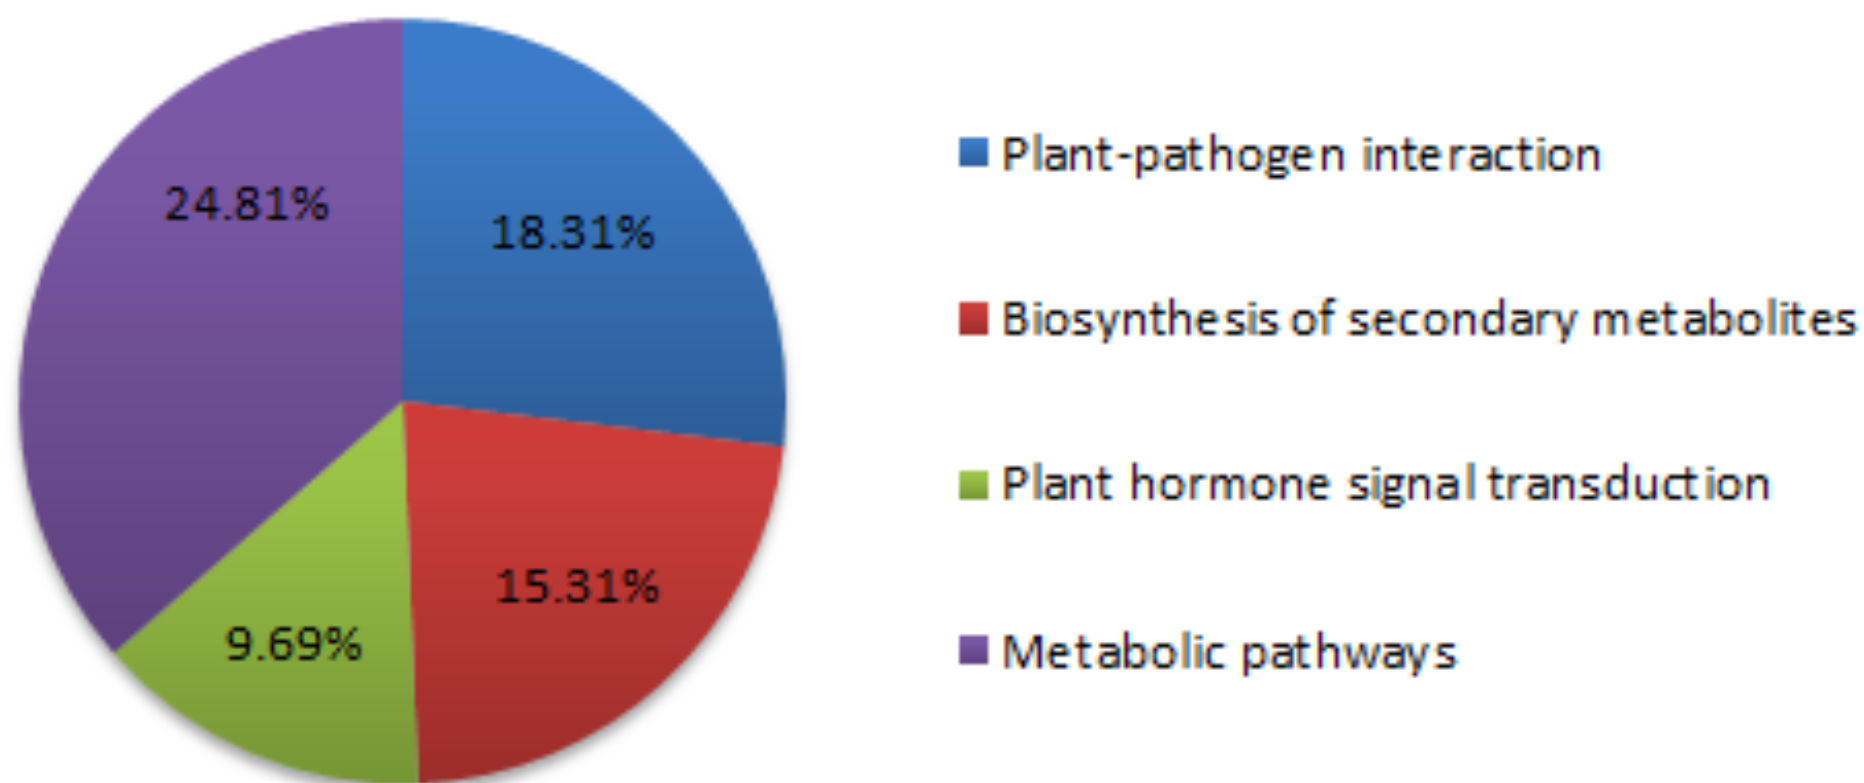

Supplement: s1 [file s1]

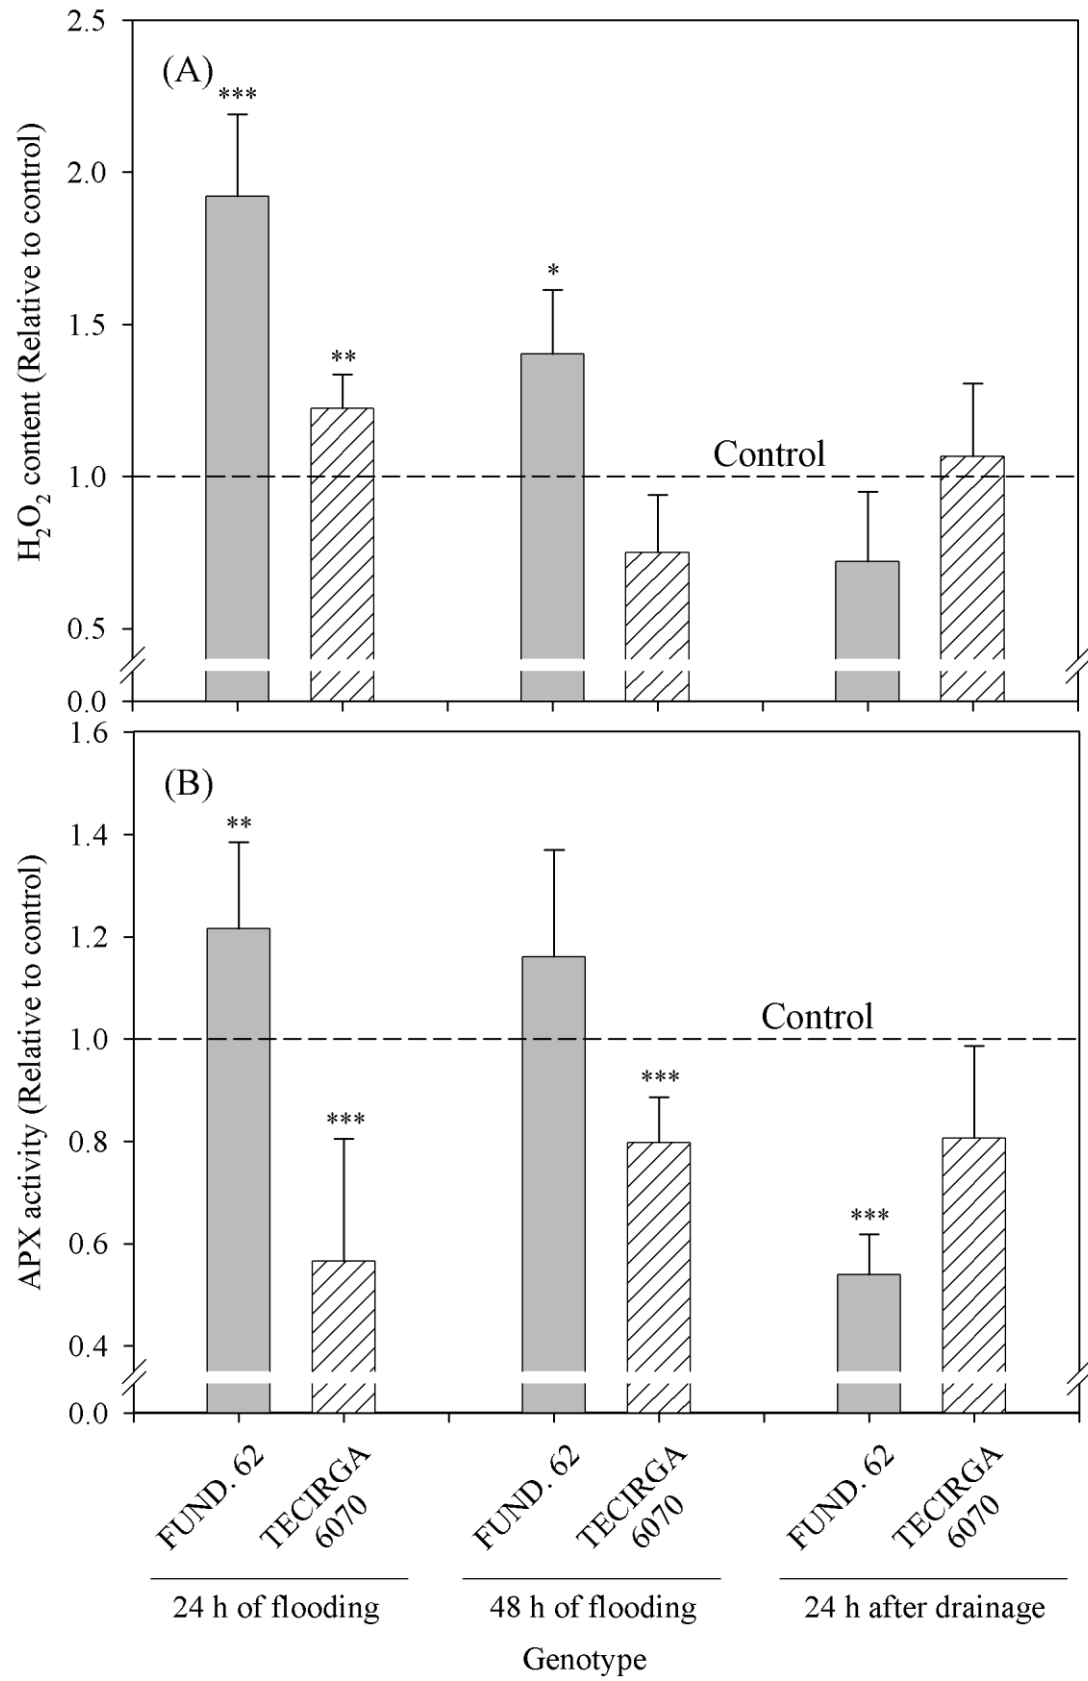

Supplement: s1 [file s1]
